# Supplementary material for: Prion Protein Misfolding Affects Calcium Homeostasis and Sensitizes Cells to Endoplasmic Reticulum Stress
Source: PubMed Central journal article supplement (PMC3012133; doi:10.1371/journal.pone.0015658), 2010-12-29
Supplement: pone.0015658.s002.pdf [file pone.0015658.s002.pdf]

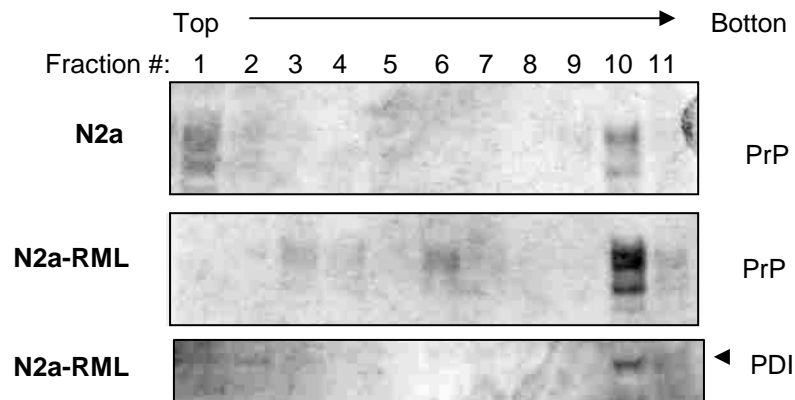

**Figure S2. Increased accumulation PrP at ER fractions in Neuro2a cells infected with RML scrapie prions.** Post-nuclear cell extracts from Neuro2a control and RML-infected cells were fractionated on a sucrose gradient to separate ER fractions as described in material and methods. Total proteins present in fractions of 1 ml were precipitated and analyzed by Western blot. Total PrP levels were monitored in each fraction. As control to identify ER-enriched fractions, the distribution of PDI was assessed by Western blot.

Torres et al., Figure S2
