# Supplementary material for: Prion Protein Misfolding Affects Calcium Homeostasis and Sensitizes Cells to Endoplasmic Reticulum Stress
Source: PubMed Central journal article supplement (PMC3012133; doi:10.1371/journal.pone.0015658), 2010-12-29
Supplement: pone.0015658.s004.pdf [file pone.0015658.s004.pdf]

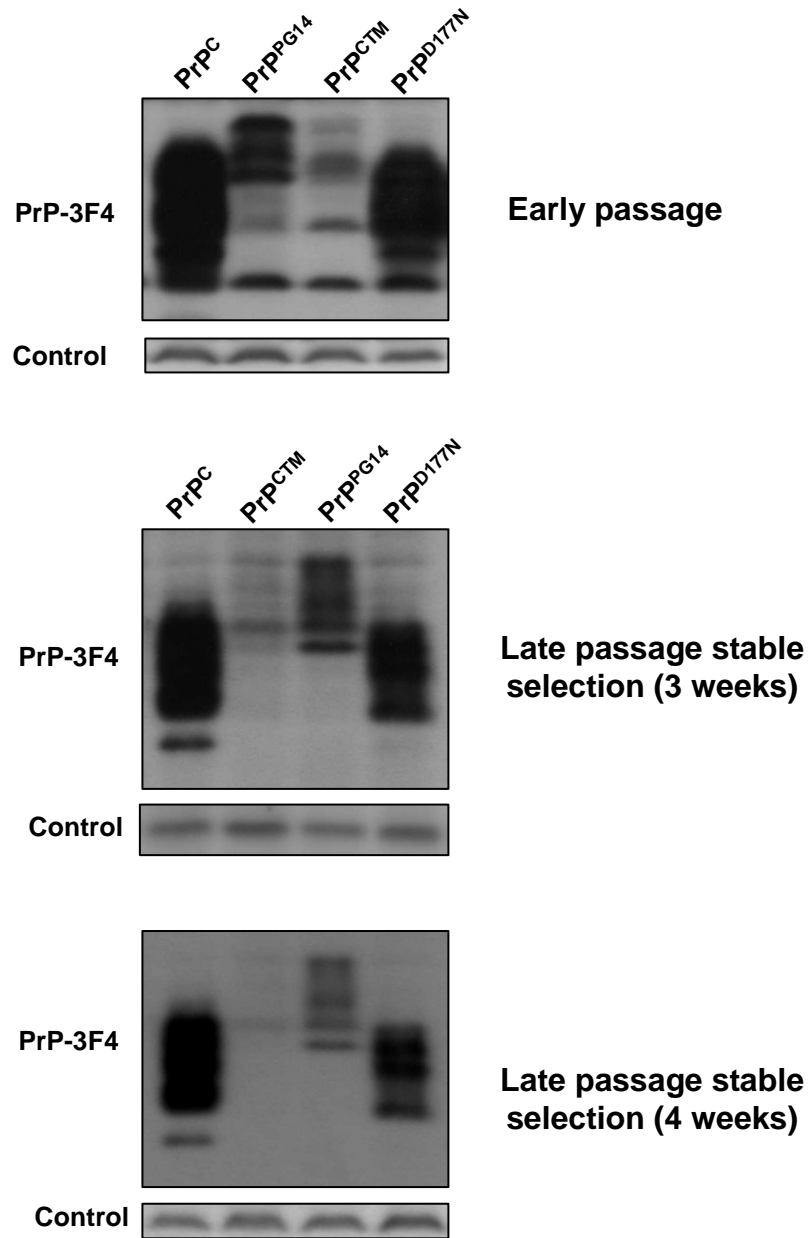

**Figure S4. Stable expression of prion mutants.** Neuro2A cells were transfected with indicated PrP expressing vectors containing the 3F4 tag epitope, and then selected with G418 (1.3 mg/ml). The expression levels for each PrP version was assessed over time by Western blot analysis during early selection (~1 week, upper panel) or after stable selection (3 week, middle panel; 4 weeks, bottom panel). As loading control a non specific band is presented from the 3F4 Western blot. Cells presented in the right panel were used to the viability assays.
